# Supplementary material
Source: MDPI journal article supplement (https://www.mdpi.com/2073-4360/6/8/2186)
Supplement: s1 [file s1]

## Supplementary Information

Data on the clinical responses of conjugates per tumour type.

### 1. HPMa Copolymer-doxorubicin (PK1; FCE28068) [4,19]

**Table S1.** Data relating to clinical trials (Phase I [Ph-I], Phase II [Ph-II]) of PK1; [Total number of patients enrolled for the study 98 <sup>a</sup>].

| tumour type                          | No. of patients<br>per tumour total<br>(Ph I/Ph II) | Clinical responses <sup>b</sup> total (Ph I/Ph II) |              |              |              |              | Tumour response<br>rate <sup>c</sup> (%) total<br>(Ph I/Ph II) |
|--------------------------------------|-----------------------------------------------------|----------------------------------------------------|--------------|--------------|--------------|--------------|----------------------------------------------------------------|
|                                      |                                                     | No. of<br>SD                                       | No. of<br>PR | No. of<br>MR | No. of<br>CR | No. of<br>NR |                                                                |
| Lung                                 | 31[(2/29(21) *)]                                    | 8[-/8]                                             | 5[2/3]       | -            | -            | 10[0/10]     | 57[100/52]                                                     |
| Breast                               | 20[3/17(14) *)]                                     | 5[-/5]                                             | 3[-/3]       | 1[1/-]       | -            | 8[2/6]       | 53[33/57]                                                      |
| Colon and/or rectum                  | 24[8/16]                                            | -                                                  | -            | 1[1/-]       | -            | 23[7/16]     | 4[4/-]                                                         |
| Adenocarcinoma<br>(Unknown primary)  | 5[5/-]                                              | -                                                  | -            | -            | -            | 5[5/-]       | 0                                                              |
| Ovary                                | 3[3/-]                                              | -                                                  | -            | -            | -            | 3[3/-]       | 0                                                              |
| Liver                                | 3[3/-]                                              | -                                                  | -            | -            | -            | 3[3/-]       | 0                                                              |
| Pancreas                             | 3[3/-]                                              | -                                                  | -            | -            | -            | 3[3/-]       | 0                                                              |
| Urinary                              | 3[3/-]                                              | -                                                  | -            | -            | -            | 3[3/-]       | 0                                                              |
| Head/Neck and brain                  | 3[3/-]                                              | -                                                  | -            | -            | -            | 3[3/-]       | 0                                                              |
| Mesothelioma                         | 2[2/-]                                              | -                                                  | -            | -            | -            | 2[2/-]       | 0                                                              |
| Oesophagus,<br>stomach and intestine | 1[1/-]                                              | -                                                  | -            | -            | -            | 1[1/-]       | 0                                                              |

Notes: <sup>a</sup> Indicates number of patients considered for the clinical evaluation; <sup>b</sup> clinical responses is the total SD, Stable disease; PR, Partial response; MR, Minor response; CR, Complete response; NR, No response; <sup>c</sup> Tumour response rate (%) is the added responses (SD + PR + MR + CR) per tumour type; \* Indicates number of patients evaluated for the tumour responses.

### 2. HPMa Copolymer-doxorubicin-galactosamine (PK2; FCE28069) [20]

**Table S2.** Data relating to clinical trials (Phase I [Ph-I]) of PK2; [Total number of patients enrolled for the study 31(18) <sup>a</sup>].

| Tumour type         | No. of patients<br>per tumour<br>(Ph I) | Clinical responses <sup>b</sup> (Ph I) |              |              |              |              | Tumour<br>response rate <sup>c</sup><br>(%) (Ph I) |
|---------------------|-----------------------------------------|----------------------------------------|--------------|--------------|--------------|--------------|----------------------------------------------------|
|                     |                                         | No. of<br>SD                           | No. of<br>PR | No. of<br>MR | No. of<br>CR | No. of<br>NR |                                                    |
| Liver               | 25                                      | -                                      | 2            | 1            | -            | 22           | 12                                                 |
| Colon and/or rectum | 6                                       | -                                      | -            | -            | -            | 6            | 0                                                  |

Notes: <sup>a</sup> Indicates number of patients considered for the clinical evaluation; <sup>b</sup> clinical responses is the total SD, Stable disease; PR, Partial response; MR, Minor response; CR, Complete response; NR, No response; <sup>c</sup> Tumour response rate (%) is the added responses (SD + PR + MR + CR) per tumour type.

### 3. Carboxymethyldextran-exatecan; DE-310 [21]

**Table S3.** Data relating to clinical trials (Phase I [Ph-I]) of DE-310; [Total number of patients enrolled for the study 29(27) <sup>a</sup>].

| Tumour type                          | No. of patients<br>per tumour<br>(Ph I) | Clinical responses <sup>b</sup> (Ph I) |              |              |              |              | Tumour<br>response rate <sup>c</sup><br>(%) (Ph I) |
|--------------------------------------|-----------------------------------------|----------------------------------------|--------------|--------------|--------------|--------------|----------------------------------------------------|
|                                      |                                         | No. of<br>SD                           | No. of<br>PR | No. of<br>MR | No. of<br>CR | No. of<br>NR |                                                    |
| Adenocarcinoma<br>(Unknown primary)  | 2                                       | 1                                      | -            | -            | 1            | 0            | 100                                                |
| Pancreas                             | 3                                       | 2                                      | 1            | -            | -            | 0            | 100                                                |
| Urinary                              | 1                                       | 1                                      | -            | -            | -            | 0            | 100                                                |
| Cervix                               | 1                                       | 1                                      | -            | -            | -            | 0            | 100                                                |
| Ovary                                | 1                                       | 1                                      | -            | -            | -            | 0            | 100                                                |
| Colon and/or rectum                  | 6                                       | 4                                      | -            | -            | -            | 2            | 67                                                 |
| Lung                                 | 3                                       | 2                                      | -            | -            | -            | 1            | 67                                                 |
| Skin                                 | 6                                       | 2                                      | -            | -            | -            | 4            | 33                                                 |
| Soft tissue sarcoma                  | 3                                       | -                                      | -            | -            | -            | 3            | 0                                                  |
| Oesophagus,<br>stomach and intestine | 3                                       | -                                      | -            | -            | -            | 3            | 0                                                  |

Notes: <sup>a</sup> Indicates number of patients considered for the clinical evaluation; <sup>b</sup> clinical responses is the total SD, Stable disease; PR, Partial response; MR, Minor response; CR, Complete Response; NR, No response;

<sup>c</sup> Tumour response rate (%) is the added responses (SD + PR + MR + CR) per tumour type.

### 4. Delimotecan; MEN 4901/T-0128 [22]

**Table S4.** Data relating to clinical trials (Phase I [Ph-I]) of MEN 4901/T-0128; [Total number of patients enrolled for the study 22 <sup>a</sup>].

| Tumour type                          | No. of patients<br>per tumour<br>(Ph I) | Clinical responses <sup>b</sup> (Ph I) |              |              |              |              | Tumour<br>response rate <sup>c</sup><br>(%) (Ph I) |
|--------------------------------------|-----------------------------------------|----------------------------------------|--------------|--------------|--------------|--------------|----------------------------------------------------|
|                                      |                                         | No. of<br>SD                           | No. of<br>PR | No. of<br>MR | No. of<br>CR | No. of<br>NR |                                                    |
| Head/Neck and brain                  | 2                                       | -                                      | 1            | -            | -            | 1            | 50                                                 |
| Colon and/or rectum                  | 7                                       | -                                      | 1            | -            | -            | 6            | 14                                                 |
| Mesothelioma                         | 3                                       | -                                      | -            | -            | -            | 3            | 0                                                  |
| Urinary                              | 1                                       | -                                      | -            | -            | -            | 1            | 0                                                  |
| Skin                                 | 1                                       | -                                      | -            | -            | -            | 1            | 0                                                  |
| Adenoid cystic                       | 1                                       | -                                      | -            | -            | -            | 1            | 0                                                  |
| Oesophagus,<br>stomach and intestine | 2                                       | -                                      | -            | -            | -            | 2            | 0                                                  |
| Adenocarcinoma<br>(Unknown primary)  | 2                                       | -                                      | -            | -            | -            | 2            | 0                                                  |
| Lung                                 | 2                                       | -                                      | -            | -            | -            | 2            | 0                                                  |
| Kidney                               | 1                                       | -                                      | -            | -            | -            | 1            | 0                                                  |
| Sarcoma (Unknown)                    | 1                                       | -                                      | -            | -            | -            | 1            | 0                                                  |

Notes: <sup>a</sup> Indicates number of patients considered for the clinical evaluation; <sup>b</sup> clinical responses is the total SD, Stable disease; PR, Partial response; MR, Minor response; CR, Complete response; NR, No response;

<sup>c</sup> Tumour response rate (%) is the added responses (SD + PR + MR + CR) per tumour type.

### 5. Poly-L-glutamic acid-camptothecin; PGA-CPT; CT-2106 [23]

**Table S5.** Data relating to clinical trials (Phase I [Ph-I]) of CT-2106; [Total number of patients enrolled for the study 26(25)<sup>a</sup>].

| Tumour type                | No of patients<br>per tumour<br>(Ph I) | Clinical responses <sup>b</sup> (Ph I) |              |              |              |              | Tumour<br>response rate <sup>c</sup><br>(%) (Ph I) |
|----------------------------|----------------------------------------|----------------------------------------|--------------|--------------|--------------|--------------|----------------------------------------------------|
|                            |                                        | No. of<br>SD                           | No. of<br>PR | No. of<br>MR | No. of<br>CR | No. of<br>NR |                                                    |
| Breast                     | 4                                      | 1                                      | -            | -            | -            | 3            | 25                                                 |
| Skin                       | 14                                     | 2                                      | -            | -            | -            | 12           | 14                                                 |
| Bone                       | 1                                      | -                                      | -            | -            | -            | 1            | 0                                                  |
| Pancreas                   | 2                                      | -                                      | -            | -            | -            | 2            | 0                                                  |
| Lung                       | 3                                      | -                                      | -            | -            | -            | 3            | 0                                                  |
| Colon and/or rectum        | 1                                      | -                                      | -            | -            | -            | 1            | 0                                                  |
| Squamous cell<br>carcinoma | 1                                      | -                                      | -            | -            | -            | 1            | 0                                                  |

Notes: <sup>a</sup> Indicates number of patients considered for the clinical evaluation; <sup>b</sup> clinical responses is the total SD, Stable disease; PR, Partial response; MR, Minor response; CR, Complete response; NR, No response;

<sup>c</sup> Tumour response rate (%) is the added responses (SD + PR + MR + CR) per tumour type.

## 6. Poly-L-glutamic acid-paclitaxel; PGA-PTX; CT-2103; XYOTAX; OPAXIO<sup>®</sup> [5,6,18,24–33]

**Table S6a.** Data relating to clinical trials (Phase I [Ph-I], Phase II [Ph-II], Phase III [Ph-III]) of CT-2103 (PGA-Paclitaxel); [Total number of patients enrolled for the study 1951 <sup>a</sup>].

| Tumour type                       | No. of patients per tumour total (Ph I/Ph II/Ph III) | Clinical responses <sup>b</sup> total (Ph I/Ph II/Ph III) |              |             |           |              |                | Tumour response rate <sup>c</sup> (%) total (Ph I/Ph II/Ph III) |
|-----------------------------------|------------------------------------------------------|-----------------------------------------------------------|--------------|-------------|-----------|--------------|----------------|-----------------------------------------------------------------|
|                                   |                                                      | No. of SD                                                 | No. of PR    | No. of MR   | No. of CR | No. of OS    | No. of NR      |                                                                 |
| Breast                            | 18[-/18/-]                                           | 2[-/2/-]                                                  | 4[-/4/-]     | 4[-/4/-]    | -         | -            | 8[-/8/-]       | 56[-/56/-]                                                      |
| Ovary                             | 99[-/99/-]                                           | 32[-/32/-]                                                | 10[-/10/-]   | -           | -         | -            | 57[-/57/-]     | 42[-/42/-]                                                      |
| Mesothelioma                      | 3[3/-/-]                                             | -                                                         | -            | 1[1/-/-]    | -         | -            | 2[2/-/-]       | 33[33/-/-]                                                      |
| Lung                              | 1798[13/-/1785]                                      | -                                                         | 13[NA/NA/NA] | 1[NA/NA/NA] | -         | 507[-/-/507] | 1277[NA/NA/NA] | 30[NA/NA/NA]                                                    |
| Oesophagus, stomach and intestine | 24[-/24/-]                                           | -                                                         | -            | 1[-/1/-]    | 4[-/4/-]  | -            | 19[-/19/-]     | 21[-/21/-]                                                      |
| Kidney                            | 3[3/-/-]                                             | -                                                         | -            | -           | -         | -            | 3[3/-/-]       | 0                                                               |
| Sarcoma (Unknown)                 | 1[1/-/-]                                             | -                                                         | -            | -           | -         | -            | 1[1/-/-]       | 0                                                               |
| Cervix                            | 1[1/-/-]                                             | -                                                         | -            | -           | -         | -            | 1[1/-/-]       | 0                                                               |
| Adrenal                           | 1[1/-/-]                                             | -                                                         | -            | -           | -         | -            | 1[1/-/-]       | 0                                                               |
| Unknown primary                   | 3[3/-/-]                                             | -                                                         | -            | -           | -         | -            | 3[3/-/-]       | 0                                                               |
| Colon and/or rectum               | 8[8/-/-]                                             | -                                                         | -            | -           | -         | -            | 8[8/-/-]       | 0                                                               |

Notes: <sup>a</sup> Indicates number of patients considered for the clinical evaluation; <sup>b</sup> clinical responses is the total SD, Stable disease; PR, Partial response; MR, Minor response; CR, Complete response; OS, Overall survival; NR, No response; <sup>c</sup> Tumour response rate (%) is the added responses (SD + PR + MR + CR + OS) per tumour type. NA, Not available.

**Table S6b.** *Cont.* [Total number of patients enrolled for the study 22 <sup>a</sup>].

| Tumour type     | No. of patients per tumour | Clinical responses <sup>b</sup> |           |           |           |           | Tumour response rate <sup>c</sup> (%) |
|-----------------|----------------------------|---------------------------------|-----------|-----------|-----------|-----------|---------------------------------------|
|                 |                            | No. of SD                       | No. of PR | No. of MR | No. of CR | No. of NR |                                       |
| Solid tumours * | 23                         | 12                              | 3         | -         | -         | 12        | 65                                    |

Notes: \* Solid tumours includes-Lung (6); Head/Neck and brain (6); Ovary (3); Pancreas (2); Oesophagus, stomach and intestine (1); Breast (1); Kidney (1); Unknown primary (1); Colon and/or rectum (2); <sup>a</sup> Indicates number of patients considered for the clinical evaluation; <sup>b</sup> clinical responses is the total SD, Stable disease; PR, Partial response; MR, Minor response; CR, Complete response; NR, No response; <sup>c</sup> Tumour response rate (%) is the added responses (SD + PR + MR + CR) per tumour type.

## 7. HPMa Copolymer-carboplatin; HPMa-Carboplatin; AP5280 [34]

**Table S7.** Data relating to clinical trials (Phase I [Ph-I]) of AP5280; [Total number of patients enrolled for the study 29(19) <sup>a</sup>].

| Tumour type                       | No. of patients per tumour (Ph I) | Clinical responses <sup>b</sup> (Ph I) |           |           |           |           | Tumour response rate <sup>c</sup> (%) (Ph I) |
|-----------------------------------|-----------------------------------|----------------------------------------|-----------|-----------|-----------|-----------|----------------------------------------------|
|                                   |                                   | No. of SD                              | No. of PR | No. of MR | No. of CR | No. of NR |                                              |
| Lung                              | 4                                 | 2                                      | -         | -         | -         | 2         | 50                                           |
| Ovary                             | 2                                 | 1                                      | -         | -         | -         | 1         | 50                                           |
| Colon and/or rectum               | 12                                | 2                                      | -         | -         | -         | 10        | 17                                           |
| Kidney                            | 3                                 | -                                      | -         | -         | -         | 3         | 0                                            |
| Oesophagus, stomach and intestine | 3                                 | -                                      | -         | -         | -         | 3         | 0                                            |
| Head/Neck and brain               | 1                                 | -                                      | -         | -         | -         | 1         | 0                                            |
| Pancreas                          | 2                                 | -                                      | -         | -         | -         | 1         | 0                                            |
| Skin                              | 2                                 | -                                      | -         | -         | -         | 2         | 0                                            |

Notes: <sup>a</sup> Indicates number of patients considered for the clinical evaluation; <sup>b</sup> clinical responses is the total SD, Stable disease; PR, Partial response; MR, Minor response; CR, Complete response; NR, No response; <sup>c</sup> Tumour response rate (%) is the added responses (SD + PR + MR + CR) per tumour type.

## 8. HPMa Copolymer-platinate; HPMa-Pt; AP5346 [35]

**Table S8.** Data relating to clinical trials (Phase I [Ph-I]) AP5346; [Total number of patients enrolled for the study 26 <sup>a</sup>].

| Tumour type                          | No. of patients<br>per tumour (Ph I) | Clinical responses <sup>b</sup> (Ph I) |           |           |           |           | Tumour response rate <sup>c</sup><br>(%) (Ph I) |
|--------------------------------------|--------------------------------------|----------------------------------------|-----------|-----------|-----------|-----------|-------------------------------------------------|
|                                      |                                      | No. of SD                              | No. of PR | No. of MR | No. of CR | No. of NR |                                                 |
| Cervix                               | 1                                    | 1                                      | -         | -         | -         | 0         | 100                                             |
| Oesophagus,<br>stomach and intestine | 1                                    | 1                                      | -         | -         | -         | 0         | 100                                             |
| Skin                                 | 5                                    | 1                                      | 1         | -         | -         | 3         | 40                                              |
| Ovary                                | 4                                    | -                                      | 1         | -         | -         | 3         | 25                                              |
| Breast                               | 4                                    | -                                      | -         | -         | -         | 4         | 0                                               |
| Adenocarcinoma<br>(Unknown primary)  | 3                                    | -                                      | -         | -         | -         | 3         | 0                                               |
| Prostate                             | 2                                    | -                                      | -         | -         | -         | 2         | 0                                               |
| Lung                                 | 1                                    | -                                      | -         | -         | -         | 1         | 0                                               |
| Pancreas                             | 1                                    | -                                      | -         | -         | -         | 1         | 0                                               |
| Kidney                               | 1                                    | -                                      | -         | -         | -         | 1         | 0                                               |
| Head/Neck and brain                  | 1                                    | -                                      | -         | -         | -         | 1         | 0                                               |
| Bone                                 | 1                                    | -                                      | -         | -         | -         | 1         | 0                                               |
| Urinary                              | 1                                    | -                                      | -         | -         | -         | 1         | 0                                               |

Notes: <sup>a</sup> Indicates number of patients considered for the clinical evaluation; <sup>b</sup> clinical responses is the total SD, Stable disease; PR, Partial response; MR, Minor response; CR, Complete response; NR, No response; <sup>c</sup> Tumour response rate (%) is the added responses (SD + PR + MR + CR) per tumour type.

## 9. HPMa copolymer-paclitaxel; HPMa-PTX; PNU166945 [36]

**Table S9.** Data relating to clinical trials (Phase I [Ph-I]) PNU166945 (HPMa-PTX); [Total number of patients enrolled for the study 12 <sup>a</sup>].

| Tumour type     | No. of patients<br>per tumour (Ph I) | Clinical responses <sup>b</sup> (Ph I) |           |           |           |           | Tumour response rate <sup>c</sup><br>(%) (Ph I) |
|-----------------|--------------------------------------|----------------------------------------|-----------|-----------|-----------|-----------|-------------------------------------------------|
|                 |                                      | No. of SD                              | No. of PR | No. of MR | No. of CR | No. of NR |                                                 |
| Solid tumours * | 12                                   | 2                                      | 1         | -         | -         | 9         | 25                                              |

Notes: \* Solid tumours includes-Ovary (4); Breast (2); Colon and/or rectum (2); Lung (1); others (3); <sup>a</sup> Indicates number of patients considered for the clinical evaluation;

<sup>b</sup> clinical responses is the total SD, Stable disease; PR, Partial response; MR, Minor response; CR, Complete response; NR, No response; <sup>c</sup> Overall tumour response rate (%) is the added responses (SD + PR + MR + CR) per tumour type; A clinical response per tumour type has not been mentioned in this respective study.

## 10. HPMa Copolymer-camptothecin; HPMa-CPT; PNU166148 [37–39]

**Table S10.** Data relating to clinical trials [(Phase I [Ph-I]) PNU166148 (HPMa-PTX); [Total number of patients enrolled for the study 48(40) <sup>a</sup>].

| Tumour type     | No. of patients<br>per Tumour (Ph I) | Clinical responses <sup>b</sup> (Ph I) |           |           |           |           | Tumour response rate <sup>c</sup><br>(%) (Ph I) |
|-----------------|--------------------------------------|----------------------------------------|-----------|-----------|-----------|-----------|-------------------------------------------------|
|                 |                                      | No. of SD                              | No. of PR | No. of MR | No. of CR | No. of NR |                                                 |
| Solid tumours * | 40                                   | 5                                      | -         | 1         | -         | 34        | 15                                              |

Notes: \* Solid tumours includes-Colon and/or rectum (18); Ovary (2); Oesophagus, stomach and intestine (4); Unknown primary (4); Head/Neck and brain (2); Lung (6); Kidney (3); Adrenal (1); Cervix (1); Bone (1); Mesothelioma (1); Prostate (1); Sarcoma (3); <sup>a</sup> Indicates number of patients considered for the clinical evaluation;

<sup>b</sup> clinical responses is the total SD, Stable disease; PR, Partial response; MR, Minor response; CR, Complete response; NR, No response; <sup>c</sup> Overall tumour response rate (%) is the added responses (SD + PR + MR + CR) per tumour type; A clinical response per tumour type has not been mentioned in this respective study.

## 11. Polyethylene-camptothecin; PEG-CPT; EZN246; Pegmaotecan; Prothecan™ [40–42]

**Table S11.** Data relating to clinical trials (Phase I [Ph-I], Phase II [Ph-II]) of PEG-CPT; [Total number of patients enrolled for the study 64(63) <sup>a</sup>].

| Tumour type                          | No. of patients per tumour<br>total (Ph I/Ph II) | Clinical responses <sup>b</sup> total (Ph I/Ph II) |           |           |           |           | Tumour response rate <sup>c</sup><br>(%) total (Ph I/Ph II) |
|--------------------------------------|--------------------------------------------------|----------------------------------------------------|-----------|-----------|-----------|-----------|-------------------------------------------------------------|
|                                      |                                                  | No. of SD                                          | No. of PR | No. of MR | No. of CR | No. of NR |                                                             |
| Bone                                 | 1[1/-]                                           | -                                                  | -         | 1[1/-]    | -         | 0[0/-]    | 100[100/-]                                                  |
| Oesophagus,<br>stomach and intestine | 42[7/35]                                         | 14[-/14]                                           | 5[-/5]    | 3[2/1]    | -         | 20[5/15]  | 52[29/57]                                                   |
| Unknown primary                      | 5[5/-]                                           | -                                                  | -         | 1[1/-]    | -         | 4[4/-]    | 20[20/-]                                                    |
| Lung                                 | 7[7/-]                                           | -                                                  | 1[1/-]    | -         | -         | 6[6/-]    | 14[14/-]                                                    |
| Colon and/or rectum                  | 25[25/-]                                         | -                                                  | -         | -         | -         | 25[25/-]  | 0                                                           |
| Liver                                | 3[3/-]                                           | -                                                  | -         | -         | -         | 3[3/-]    | 0                                                           |
| Head/Neck and brain                  | 2[2/-]                                           | -                                                  | -         | -         | -         | 2[2/-]    | 0                                                           |
| Mesothelioma                         | 1[1/-]                                           | -                                                  | -         | -         | -         | 1[1/-]    | 0                                                           |
| Ovary                                | 1[1/-]                                           | -                                                  | -         | -         | -         | 1[1/-]    | 0                                                           |
| Pancreas                             | 4[4/-]                                           | -                                                  | -         | -         | -         | 4[4/-]    | 0                                                           |
| Sarcoma (Unknown)                    | 2[2/-]                                           | -                                                  | -         | -         | -         | 2[2/-]    | 0                                                           |
| Breast                               | 1[1/-]                                           | -                                                  | -         | -         | -         | 1[1/-]    | 0                                                           |
| Lymphoma                             | 1[1/-]                                           | -                                                  | -         | -         | -         | 1[1/-]    | 0                                                           |
| Skin                                 | 2[2/-]                                           | -                                                  | -         | -         | -         | 2[2/-]    | 0                                                           |
| Leiomyosarcoma                       | 2[2/-]                                           | -                                                  | -         | -         | -         | 2[2/-]    | 0                                                           |

Notes: <sup>a</sup> Indicates number of patients considered for the clinical evaluation; <sup>b</sup> clinical responses is the total SD, Stable disease; PR, Partial response; MR, Minor response; CR, Complete response; NR, No response; <sup>c</sup> Tumour response rate (%) is the added responses (SD + PR + MR + CR) per tumour type.



## 12. Polyethylene Glycol-Paclitaxel; PEG-PTX [43]

**Table S12.** Data relating to clinical trials (Phase I [Ph-I]) of PEG-PTX; [Total number of patients enrolled for the study 13 <sup>a</sup>].

| Tumour type     | No. of patients<br>per tumour (Ph I) | Clinical responses <sup>b</sup> (Ph I) |           |           |           |           | Tumour response rate <sup>c</sup><br>(%) (Ph I) |
|-----------------|--------------------------------------|----------------------------------------|-----------|-----------|-----------|-----------|-------------------------------------------------|
|                 |                                      | No. of SD                              | No. of PR | No. of MR | No. of CR | No. of NR |                                                 |
| Solid tumours * | 13                                   | NA                                     |           |           |           |           | NC                                              |

Notes: \* Solid tumours includes-Colon and/or rectum (3); Breast (2); Neuroendocrine (2); Lung (1); Prostrate (1); Others (4); <sup>a</sup> Indicates number of patients considered for the clinical evaluation; <sup>b</sup> clinical responses is the total SD, Stable disease; PR, Partial response; MR, Minor response; CR, Complete response; NR, No response; <sup>c</sup> Tumour response rate (%) is the added responses (SD + PR + MR + CR) per tumour type; NA-Not available; NC-Not calculated.

## 13. Multiarm-Polyethylene-SN38; EZN-2208 [44,45]

**Table S13.** Data relating to clinical trials (Phase I [Ph-I], Phase II [Ph-II]) of PEG-CPT; [Total number of patients enrolled for the study 264(196) <sup>a</sup>].

| Tumour type                          | No. of patients per tumour<br>total (Ph I/Ph II) | Clinical responses <sup>b</sup> total (Ph I/Ph II) |           |           |           |             | Tumour response rate <sup>c</sup><br>(%) total (Ph I/Ph II) |
|--------------------------------------|--------------------------------------------------|----------------------------------------------------|-----------|-----------|-----------|-------------|-------------------------------------------------------------|
|                                      |                                                  | No. of SD                                          | No. of PR | No. of MR | No. of CR | No. of NR   |                                                             |
| Urinary                              | 1[1/-]                                           | 1[1/-]                                             | -         | -         | -         | 0[0/-]      | 100[100/-]                                                  |
| Oesophagus,<br>stomach and intestine | 3[3/-]                                           | 2[2/-]                                             | -         | -         | -         | 1[1/-]      | 67[67/-]                                                    |
| Breast                               | 3[3/-]                                           | 2[2/-]                                             | -         | -         | -         | 1[1/-]      | 67[67/-]                                                    |
| Lung                                 | 2[2/-]                                           | 1[1/-]                                             | -         | -         | -         | 1[1/-]      | 50[50/-]                                                    |
| Pancreas                             | 3[3/-]                                           | 1[1/-]                                             | -         | -         | -         | 2[2/-]      | 33[33/-]                                                    |
| Colon and/or rectum                  | 236[25/211(192) *]                               | 32[12/20]                                          | 4[-/4]    | -         | -         | 181[13/168] | 17[48/13]                                                   |
| Carcinoid                            | 1[1/-]                                           | -                                                  | -         | -         | -         | 1[1/-]      | 0                                                           |
| Ovary                                | 1[1/-]                                           | -                                                  | -         | -         | -         | 1[1/-]      | 0                                                           |
| Prostate                             | 1[1/-]                                           | -                                                  | -         | -         | -         | 1[1/-]      | 0                                                           |
| Soft tissue sarcoma                  | 1[1/-]                                           | -                                                  | -         | -         | -         | 1[1/-]      | 0                                                           |

Notes: <sup>a</sup> Indicates number of patients considered for the clinical evaluation; <sup>b</sup> clinical responses is the total SD, Stable disease; PR, Partial response; MR, Minor response; CR, Complete response; NR, No response; <sup>c</sup> Tumour response rate (%) is the added responses (SD + PR + MR + CR) per tumour type. \* Indicates number of patients evaluated for the tumour responses.

#### 14. Multiarm-Polyethylene glycol-Paclitaxel; PEG-PTX; NKTR-102 [46–48]

**Table S14.** Data relating to clinical trials (Phase I [Ph-I], Phase II [Ph-II]) NKTR-102; [Total number of patients enrolled for the study 127(125) <sup>a</sup>].

| Tumour type     | No. of patients per tumour<br>total (Ph I/Ph II) | Clinical responses <sup>b</sup> total (Ph I/Ph II) |           |           |           |           | Tumour response rate <sup>c</sup><br>(%) total (Ph I/Ph II) |
|-----------------|--------------------------------------------------|----------------------------------------------------|-----------|-----------|-----------|-----------|-------------------------------------------------------------|
|                 |                                                  | No. of SD                                          | No. of PR | No. of MR | No. of CR | No. of NR |                                                             |
| Solid tumours * | 125[32/68]                                       | 28[-/28]                                           | 24[7/17]  | 6[6/-]    | 2[2/-]    | 65[8/23]  | 48[47/66]                                                   |

Notes: \* Solid tumours includes-Ovary; Breast; Adrenal; Oesophagus, stomach and intestine; Lymphoma; Lung; Cervix; Head/Neck and brain; Urinary; <sup>a</sup> Indicates number of patients considered for the clinical evaluation; <sup>b</sup> clinical responses is the total SD, Stable disease; PR, Partial response; MR, Minor response; CR, Complete response; NR, No response; <sup>c</sup> Tumour response rate (%) is the added responses (SD + PR + MR + CR) per tumour type; A clinical response per tumour type has not been mentioned in this respective study.

#### 15. Multiarm-Polyethylene glycol-docetaxel; NKTR-105 [50]

NKTR-105 was clinically evaluated in [Phase-I] trials involving 17 patients with different solid tumours. The data of this study was not available.

**Table S15.** Data on clinical trials ([Phase I [Ph-I]) NKTR-105; [Total number of patients enrolled for the study 17 <sup>a</sup>].

| Tumour type | No. of patients<br>per tumour (Ph I) | Clinical responses <sup>b</sup> (Ph I) |           |           |           |           | Tumour response rate <sup>c</sup><br>(%) (Ph I) |
|-------------|--------------------------------------|----------------------------------------|-----------|-----------|-----------|-----------|-------------------------------------------------|
|             |                                      | No. of SD                              | No. of PR | No. of MR | No. of CR | No. of NR |                                                 |
| NA          | 17                                   | NA                                     | NA        | NA        | NA        | NC        | NC                                              |

Notes: <sup>a</sup> Indicates number of patients considered for the clinical evaluation; <sup>b</sup> clinical responses is the total SD, Stable disease; PR, Partial response; MR, Minor response; CR, Complete response; NR, No response; <sup>c</sup> Tumour response rate (%) is the added responses (SD + PR + MR + CR) per tumour type; NA, Not available; NC, Not calculated.

## 16. PHF-Camptotecin; PHF-CPT; MER-1001; XMT-1001 [51]

**Table S16.** Data relating to clinical trials (Phase I [Ph-I]) XMT-1001; [Total number of patients enrolled for the study 49(46) <sup>a</sup>].

| Tumour type                          | No. of patients<br>per tumour (Ph I) | Clinical responses <sup>b</sup> (Ph I) |           |           |           |           | Tumour response rate <sup>c</sup><br>(%) (Ph I) |
|--------------------------------------|--------------------------------------|----------------------------------------|-----------|-----------|-----------|-----------|-------------------------------------------------|
|                                      |                                      | No. of SD                              | No. of PR | No. of MR | No. of CR | No. of NR |                                                 |
| Skin                                 | 2                                    | 1                                      | -         | -         | -         | 1         | 50                                              |
| Lung                                 | 7                                    | 3                                      | -         | -         | -         | 4         | 43                                              |
| Solid tumours (Unspecified)          | 8                                    | 3                                      | -         | -         | -         | 5         | 38                                              |
| Ovary                                | 3                                    | 1                                      | -         | -         | -         | 2         | 33                                              |
| Oesophagus,<br>stomach and intestine | 3                                    | 1                                      | -         | -         | -         | 2         | 33                                              |
| Colon and/or rectum                  | 11                                   | 2                                      | -         | -         | -         | 9         | 18                                              |
| Pancreas                             | 9                                    | 1                                      | -         | -         | -         | 8         | 11                                              |
| Breast                               | 4                                    | -                                      | -         | -         | -         | 4         | 0                                               |
| Unknown primary                      | 2                                    | -                                      | -         | -         | -         | 2         | 0                                               |

Notes: <sup>a</sup> Indicates number of patients considered for the clinical evaluation; <sup>b</sup> clinical responses is the total SD, Stable disease; PR, Partial response; MR, Minor response; CR, Complete response; NR, No response; <sup>c</sup> Tumour response rate (%) is the added responses (SD + PR + MR + CR) per tumour type.

## 17. Cyclodextrin-Camptothecin; CRLX101; IT-101 [52]

**Table S17.** Data relating to clinical trials (Phase I [Ph-I]) IT-101; [Total number of patients enrolled for the study 62 <sup>a</sup>].

| Tumour type     | No. of patients<br>per tumour (Ph I) | Clinical responses <sup>b</sup> (Ph I) |           |           |           |           | Tumour response rate <sup>c</sup><br>(%) (Ph I) |
|-----------------|--------------------------------------|----------------------------------------|-----------|-----------|-----------|-----------|-------------------------------------------------|
|                 |                                      | No. of SD                              | No. of PR | No. of MR | No. of CR | No. of NR |                                                 |
| Lung            | 27                                   | 16                                     | -         | -         | -         | 11        | 59                                              |
| Solid tumours * | 35                                   | 28                                     | -         | -         | -         | 7         | 80                                              |

Notes: \* Solid tumours includes-Pancreas (11); Head/Neck and brain (4); Kidney (4); Ovary (3); Breast (3); Cervix (2); Colon and/or rectum (1); Oesophagus, stomach and intestine (1); Liver (5); Urinary (1); <sup>a</sup> Indicates number of patients considered for the clinical evaluation; <sup>b</sup> clinical responses is the total SD, Stable disease; PR, Partial response; MR, Minor response; CR, Complete response; NR, No response; <sup>c</sup> Tumour response rate (%) is the added responses (SD + PR + MR + CR) per tumour type.

**18. Hyaluronic Acid-Paclitaxel (ONCOFID-P™) [53]****Table S18.** Data relating to clinical trials (Phase I [Ph-I]) ONCOFID-P™; [Total number of patients enrolled for the study 16(15) <sup>a</sup>].

| Tumour type | No. of patients<br>per tumour (Ph I) | Clinical responses <sup>b</sup> (Ph I) |           |           |           |           | Tumour response rate <sup>c</sup><br>(%) (Ph I) |
|-------------|--------------------------------------|----------------------------------------|-----------|-----------|-----------|-----------|-------------------------------------------------|
|             |                                      | No. of SD                              | No. of PR | No. of MR | No. of CR | No. of NR |                                                 |
| Urinary     | 15                                   | -                                      | -         | -         | 9         | 6         | 60                                              |

Notes: <sup>a</sup> Indicates number of patients considered for the clinical evaluation; <sup>b</sup> clinical responses is the total SD, Stable disease; PR, Partial response; MR, Minor response; CR, Complete Response; NR, No response; <sup>c</sup> Tumour response rate (%) is the added responses (SD + PR + MR + CR) per tumour type.

**19. Oxidized Dextran-Doxorubicin; OXD-DOX (AD-70) [54]****Table S19.** Data relating to clinical trials (Phase I [Ph-I]) AD-70 (OXD-DOX); [Total number of patients enrolled for the study 13 <sup>a</sup>].

| Tumour type                          | No. of patients<br>per tumour (Ph I) | Clinical responses <sup>b</sup> (Ph I) |           |           |           |           | Tumour response rate <sup>c</sup><br>(%) (Ph I) |
|--------------------------------------|--------------------------------------|----------------------------------------|-----------|-----------|-----------|-----------|-------------------------------------------------|
|                                      |                                      | No. of SD                              | No. of PR | No. of MR | No. of CR | No. of NR |                                                 |
| Colon and/or rectum                  | 6                                    | 1                                      | -         | -         | -         | 5         | 17                                              |
| Oesophagus,<br>stomach and intestine | 2                                    | -                                      | -         | -         | -         | 2         | 0                                               |
| Lung                                 | 2                                    | -                                      | -         | -         | -         | 2         | 0                                               |
| Urinary                              | 1                                    | -                                      | -         | -         | -         | 1         | 0                                               |
| Head/Neck and brain                  | 1                                    | -                                      | -         | -         | -         | 1         | 0                                               |
| Skin                                 | 1                                    | -                                      | -         | -         | -         | 1         | 0                                               |

Notes: <sup>a</sup> Indicates number of patients considered for the clinical evaluation; <sup>b</sup> clinical responses is the total SD, Stable disease; PR, Partial response; MR, Minor response; CR, Complete Response; NR, No response; <sup>c</sup> Tumour response rate (%) is the added responses (SD + PR + MR + CR) per tumour type.
